# Supplementary material for: Photoelectric synergistic anisotropic slippery interface for directional droplets manipulation
Source: Royal Society of Chemistry journal article supplement (doi:10.1039/d3nr02779a), 2023-01-01
Supplement: d3nr02779a1.pdf [file d3nr02779a1.pdf]

## Supporting Information

### **Photoelectric Synergistic Anisotropic Slippery Interface for Directional Manipulation of Droplets**

Xu Sun, Xuan Wang, Pu Guo, Lei Jiang and Liping Heng\*

School of Chemistry, Beihang University, Beijing 100191, China. E-mail: [henglp@buaa.edu.cn](mailto:henglp@buaa.edu.cn);  
Fax: +86 10-82627566.

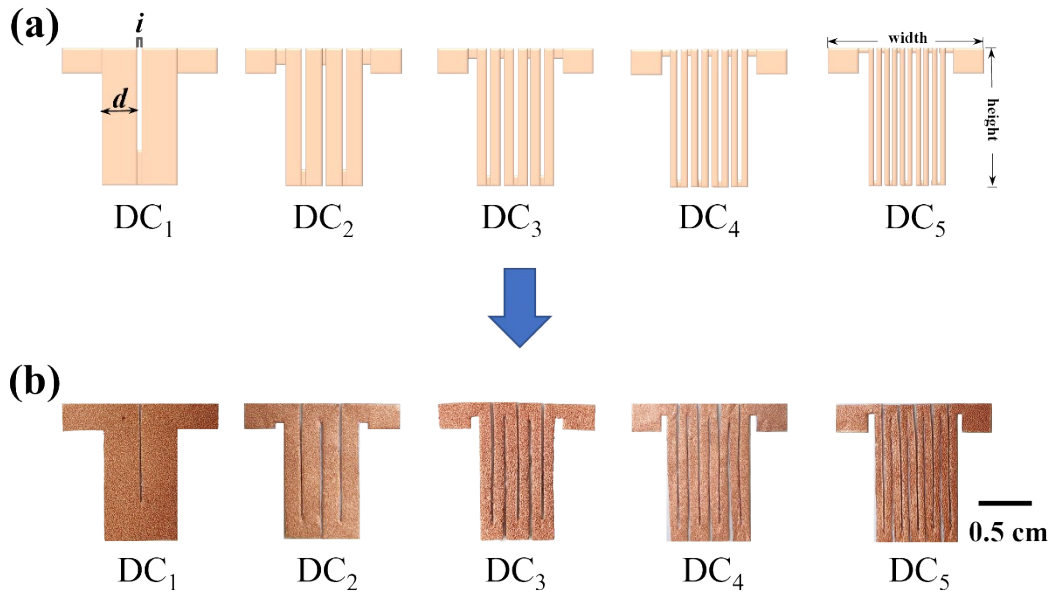

**Fig. S1** (a) The schematic diagram and (b) optical diagram of DC sample with different stripe numbers. Specific size parameters: the sample height is 2.7 cm, and the width is 1.45 cm. The spacing ( $i$ ) of each pair of directional structures is 500  $\mu\text{m}$ . Directional structure width ( $d$ ) of DC<sub>1</sub>, DC<sub>2</sub>, DC<sub>3</sub>, DC<sub>4</sub>, and DC<sub>5</sub> samples is 7.0 mm, 3.25 mm, 2.0 mm, 1.375 mm, and 1.0 mm, respectively.

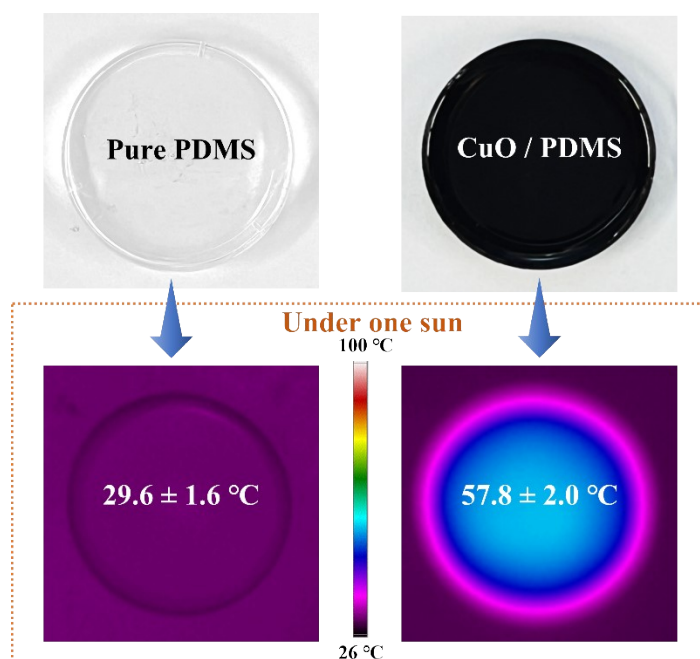

**Fig. S2** The optical images of pure PDMS substrate and CuO/PDMS substrate and the infrared images of them under one sunlight.

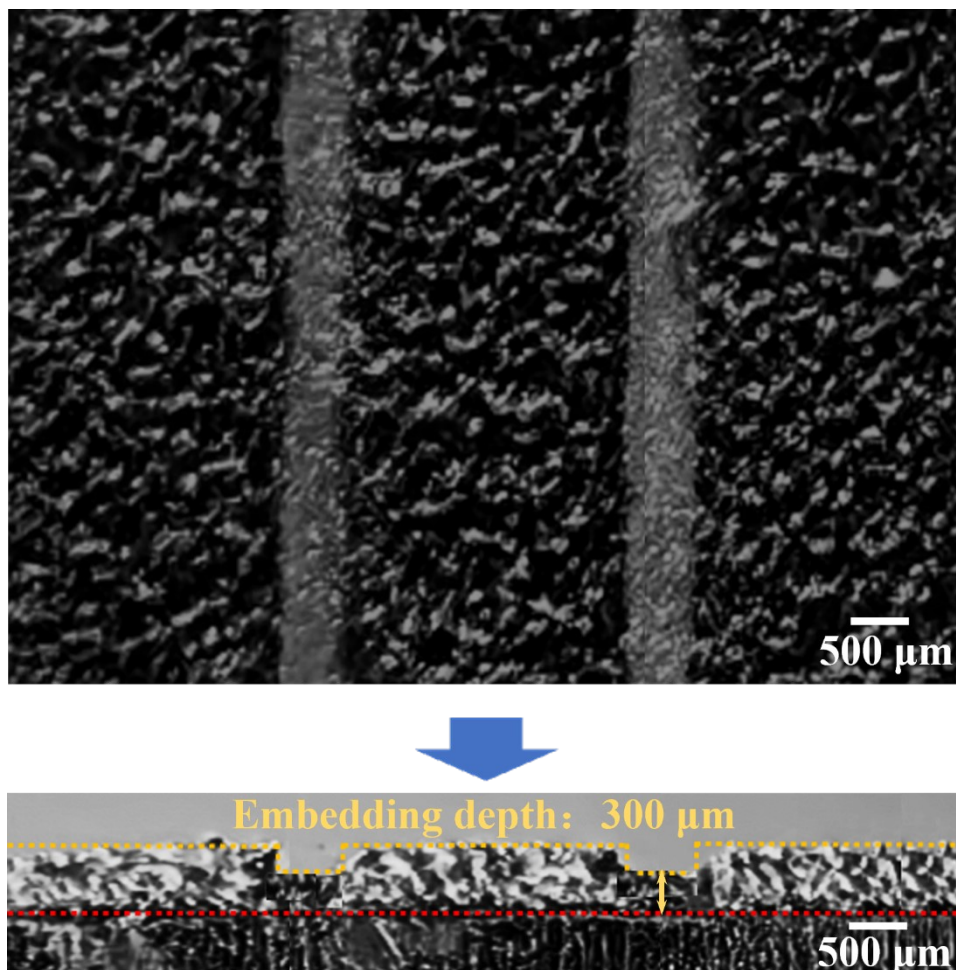

**Fig. S3** Top-view optical image and side-view optical image of DOC<sub>3</sub>-S.

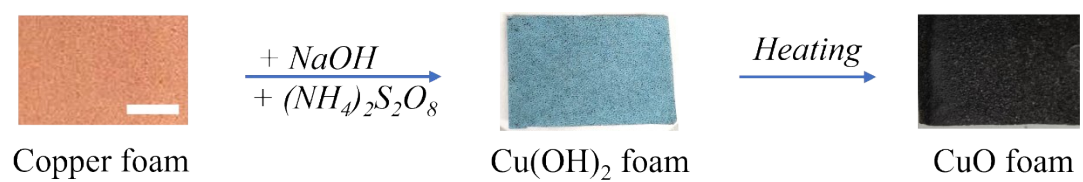

**Fig. S4** Process of the copper foam was oxidized to copper hydroxide and copper oxide and their surface optical images (scale: 1 cm).

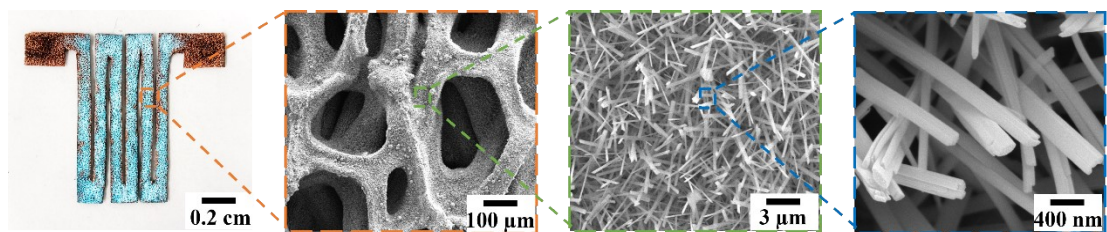

**Fig. S5** Optical image of the sample after preliminary oxidation, SEM image of  $\text{Cu}(\text{OH})_2$  grown on the surface of copper foam, and its enlarged image.

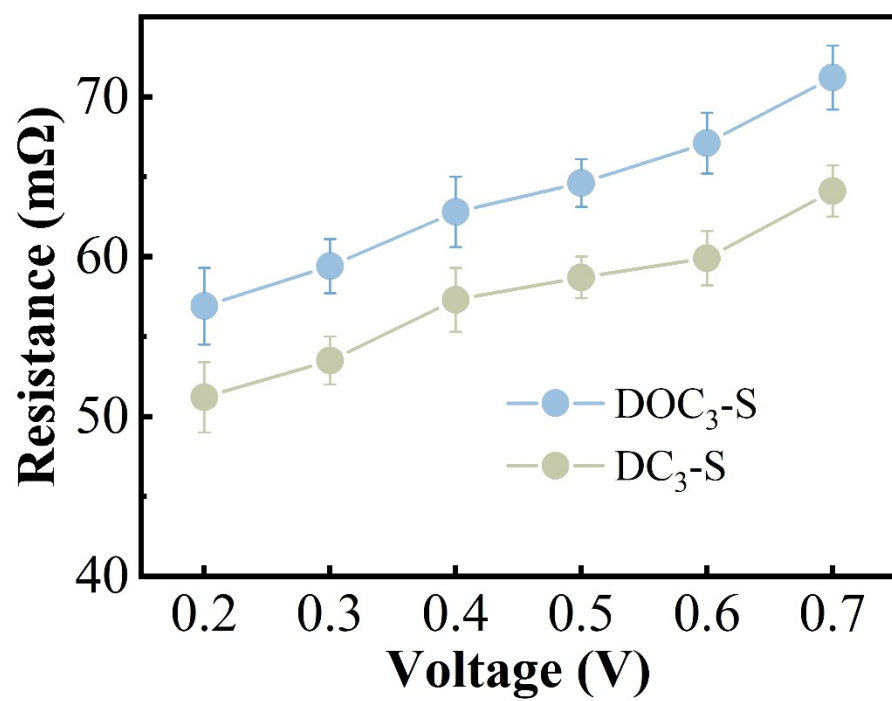

**Fig. S6** The resistance changes of the sample before and after oxidation under 0.2 ~ 0.7 V voltages.

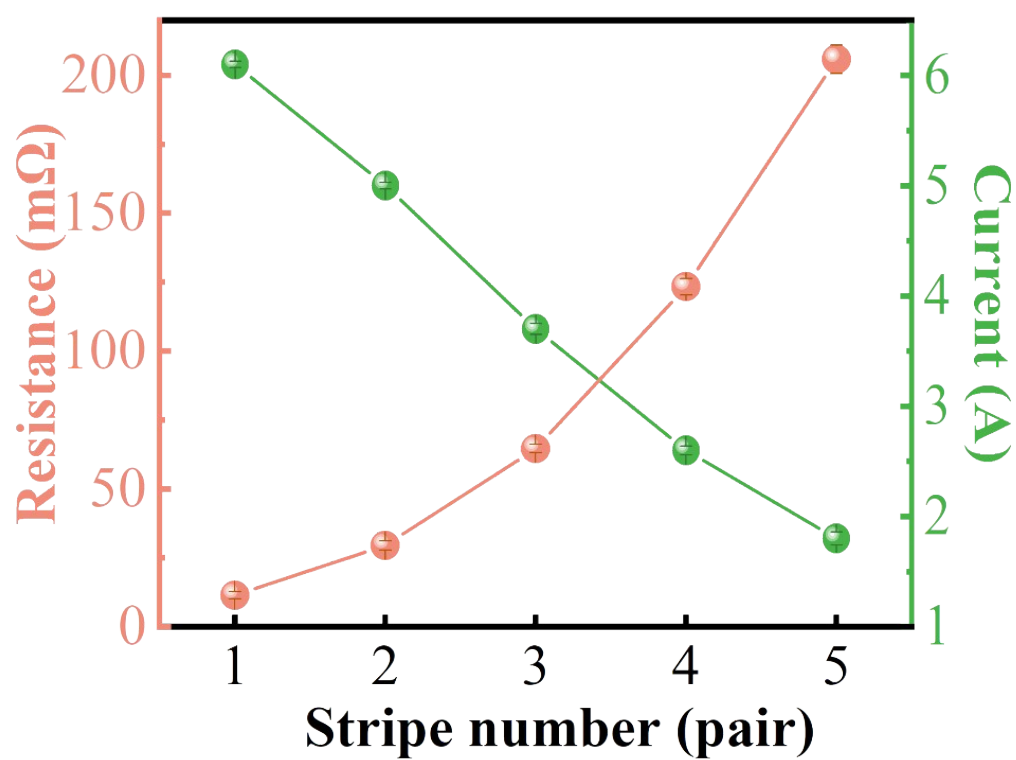

**Fig. S7** Current and resistance variation of DOC-S samples with different stripe numbers at 0.5 V.

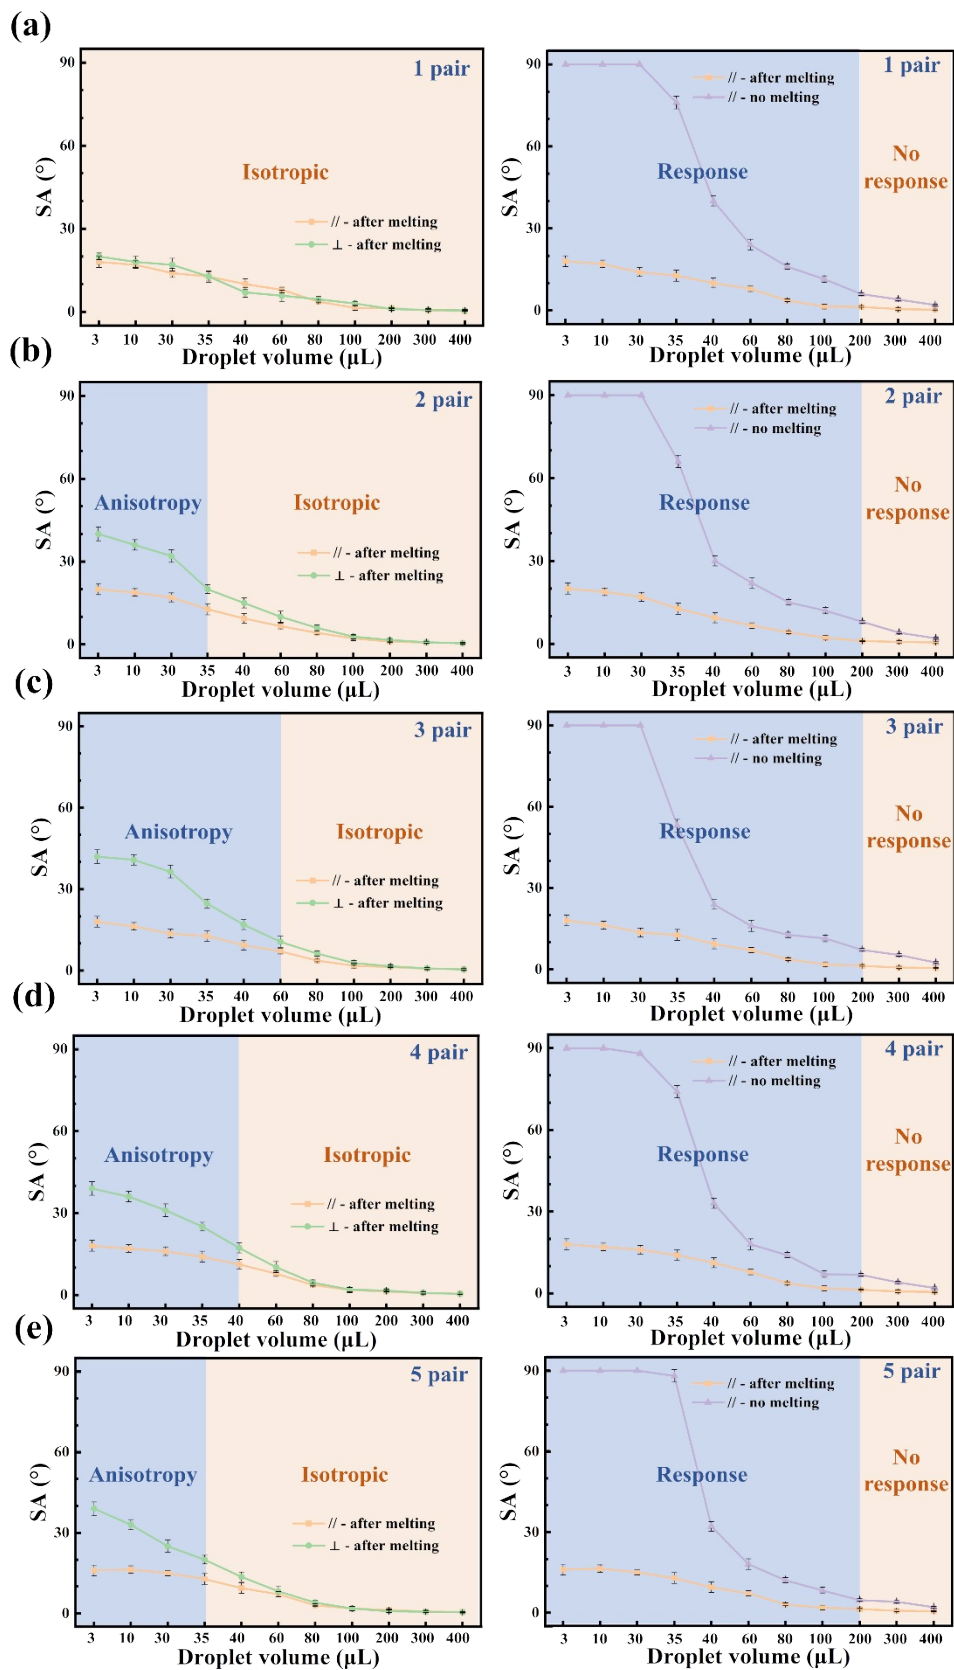

**Fig. S8** SAs changes of different volume water in parallel and vertical directions before and after paraffin melting on (a) P/DOC<sub>1</sub>-S surface, (b) P/DOC<sub>2</sub>-S surface, (c) P/DOC<sub>3</sub>-S surface, (d) P/DOC<sub>4</sub>-S surface, and (e) P/DOC<sub>5</sub>-S surface.
